# Supplementary material
Source: PubMed Central journal article supplement (PMC4677673)

Table S2. Multiple regression results of weight stigma and outcome measures unadjusted for income or global perceived stress.

|                                                          | Predictor     | $\beta$ | b                   | SE               | 95% CI                                |
|----------------------------------------------------------|---------------|---------|---------------------|------------------|---------------------------------------|
| <b>Composite Weight Stigma Frequency + Consciousness</b> |               |         |                     |                  |                                       |
| Cortisol                                                 |               |         |                     |                  |                                       |
| Morning Serum<br>(n = 44)                                | Composite     | 0.37*   | 0.33*               | 0.13             | 0.06 , 0.60                           |
|                                                          | Abdominal Fat | -0.31*  | 0.00*               | 0.00             | -4E <sup>-4</sup> , -7E <sup>-6</sup> |
| Daily Total (AUC)<br>(n = 37)                            | Composite     | 0.42*   | 0.37*               | 0.15             | 0.07 , 0.66                           |
|                                                          | Abdominal Fat | -0.18   | 0.00                | 0.00             | 0.00 , 0.00                           |
| Awakening Response<br>(n = 41)                           | Composite     | 0.38*   | 6.66*               | 2.79             | 1.03 , 12.30                          |
|                                                          | Abdominal Fat | -0.15   | -0.002              | 0.002            | -0.01 , 0.002                         |
| Diurnal Slope<br>(n = 40)                                | Composite     | 0.07    | 0.90                | 2.10             | -3.35 , 5.15                          |
|                                                          | Abdominal Fat | -0.20   | -0.002              | 0.001            | -0.004 , 0.001                        |
| F2-Isoprostanes<br>(n = 44)                              | Composite     | 0.36*   | 0.29*               | 0.11             | 0.06 , 0.51                           |
|                                                          | Abdominal Fat | 0.21    | 0.00                | 0.00             | 0.00 , 0.00                           |
|                                                          | Age           | -0.20   | -0.01               | 0.01             | -0.02 , 0.004                         |
| <b>Weight Stigma Frequency</b>                           |               |         |                     |                  |                                       |
| Cortisol                                                 |               |         |                     |                  |                                       |
| Morning Serum<br>(n = 44)                                | Frequency     | 0.36*   | 0.004*              | 0.002            | 0.001 , 0.01                          |
|                                                          | Abdominal Fat | -0.38*  | -2E <sup>-4</sup> * | 1E <sup>-4</sup> | -4E <sup>-4</sup> , -3E <sup>-5</sup> |
| Daily Total (AUC)<br>(n = 37)                            | Frequency     | 0.34    | 0.004               | 0.002            | 0.00 , 0.01                           |
|                                                          | Abdominal Fat | -0.20   | 0.00                | 0.00             | 0.00 , 0.00                           |
| Awakening Response<br>(n = 41)                           | Frequency     | 0.28    | 0.06                | 0.04             | -0.02 , 0.14                          |
|                                                          | Abdominal Fat | -0.17   | -0.002              | 0.002            | -0.01 , 0.002                         |
| Diurnal Slope<br>(n = 40)                                | Frequency     | 0.15    | 0.03                | 0.03             | -0.04 , 0.08                          |
|                                                          | Abdominal Fat | -0.24   | -0.002              | 0.001            | -0.01 , 0.001                         |
| F2-Isoprostanes<br>(n = 44)                              | Frequency     | 0.29    | 0.003               | 0.002            | 0.00 , 0.01                           |
|                                                          | Abdominal Fat | 0.24    | 0.00                | 0.00             | 0.00 , 0.00                           |
|                                                          | Age           | -0.10   | -0.004              | 0.01             | -0.02 , 0.01                          |
| <b>Weight Stigma Consciousness</b>                       |               |         |                     |                  |                                       |
| Cortisol                                                 |               |         |                     |                  |                                       |
| Morning Serum<br>(n = 45)                                | Consciousness | 0.28    | 0.02                | 0.01             | -0.001 , 0.03                         |
|                                                          | Abdominal Fat | -0.23   | 0.00                | 0.00             | 0.00 , 0.00                           |
| Daily Total (AUC)<br>(n = 38)                            | Consciousness | 0.38*   | 0.02*               | 0.01             | 0.003 , 0.04                          |
|                                                          | Abdominal Fat | -0.09   | 0.00                | 0.00             | 0.00 , 0.00                           |
| Awakening Response<br>(n = 42)                           | Consciousness | 0.36*   | 0.38*               | 0.16             | 0.06 , 0.70                           |
|                                                          | Abdominal Fat | -0.06   | -0.001              | 0.002            | -0.004 , 0.003                        |
| Diurnal Slope<br>(n = 41)                                | Consciousness | 0.01    | 0.01                | 0.12             | -0.24 , 0.25                          |
|                                                          | Abdominal Fat | -0.18   | -0.001              | 0.001            | -0.004 , 0.001                        |
| F2-Isoprostanes<br>(n = 38)                              | Consciousness | 0.35*   | 0.02*               | 0.01             | 0.004 , 0.03                          |
|                                                          | Abdominal Fat | 0.27    | 0.00                | 0.00             | 0.00 , 0.00                           |
|                                                          | Age           | -0.25   | -0.01               | 0.01             | -0.03 , 0.001                         |

Note: Cortisol units are ln(mg/dL) for serum and ln(nmol/L) for saliva; F2-Isoprostane units are

---

ln(ng/mL); CI = Confidence Interval; \* $p < 0.05$  (2-tailed);  $\beta$  values represent standardized units, whereas  $b$  values represent raw values. We provide  $>3$  decimal places only when  $p < .05$ .

Table S3. Multiple regression results of weight stigma and outcome measures controlling for total body fat percentage and other confounds.

|                                                          | Predictor     | $\beta$ | b      | SE    | 95% CI         |
|----------------------------------------------------------|---------------|---------|--------|-------|----------------|
| <b>Composite Weight Stigma Frequency + Consciousness</b> |               |         |        |       |                |
| Cortisol                                                 |               |         |        |       |                |
| Morning Serum<br>(n = 44)                                | Composite     | 0.41*   | 0.37*  | 0.15  | 0.06 , 0.68    |
|                                                          | % Body Fat    | -0.31   | -2.52  | 1.27  | -5.09 , 0.04   |
|                                                          | Income        | -0.01   | -0.001 | 0.04  | -0.08 , 0.08   |
|                                                          | Global Stress | -0.09   | -0.06  | 0.11  | -0.27 , 0.15   |
| Daily Total (AUC)<br>(n = 37)                            | Composite     | 0.34    | 0.30   | 0.15  | -0.002 , 0.60  |
|                                                          | % Body Fat    | -0.19   | -1.35  | 1.13  | -3.65 , 0.96   |
|                                                          | Income        | -0.13   | -0.30  | 0.04  | -0.11 , 0.05   |
|                                                          | Global Stress | 0.23    | 0.13   | 0.09  | -0.06 , 0.33   |
| Awakening Response<br>(n = 41)                           | Composite     | 0.31    | 5.43   | 2.88  | -0.42 , 11.27  |
|                                                          | % Body Fat    | -0.06   | -8.68  | 23.74 | -56.77 , 39.41 |
|                                                          | Income        | 0.16    | 0.78   | 0.74  | -0.71 , 2.28   |
|                                                          | Global Stress | 0.34*   | 4.55*  | 2.01  | 0.47 , 8.63    |
| Diurnal Slope<br>(n = 40)                                | Composite     | 0.15    | 1.87   | 2.30  | -2.80 , 6.54   |
|                                                          | % Body Fat    | -0.21   | -22.40 | 18.76 | -60.45 , 15.65 |
|                                                          | Income        | -0.03   | -0.11  | 0.60  | -1.33 , 1.11   |
|                                                          | Global Stress | -0.24   | -2.25  | 1.57  | -5.44 , 0.94   |
| F2-Isoprostanes<br>(n = 44)                              | Composite     | 0.35*   | 0.28*  | 0.13  | 0.02 , 0.54    |
|                                                          | % Body Fat    | 0.10    | 0.72   | 1.11  | -1.53 , 2.97   |
|                                                          | Age           | -0.20   | -0.01  | 0.01  | -0.03 , 0.01   |
|                                                          | Income        | -0.07   | -0.02  | 0.03  | -0.08 , 0.06   |
|                                                          | Global Stress | 0.07    | 0.04   | 0.09  | -0.14 , 0.22   |
| <b>Weight Stigma Frequency</b>                           |               |         |        |       |                |
| Cortisol                                                 |               |         |        |       |                |
| Morning Serum<br>(n = 44)                                | Frequency     | 0.34*   | 0.004* | 0.002 | 0.00 , 0.01    |
|                                                          | % Body Fat    | -0.35*  | -2.91* | 1.35  | -5.64 , -0.18  |
|                                                          | Income        | 0.008   | 0.002  | 0.04  | -0.08 , 0.08   |
| Daily Total (AUC)<br>(n = 37)                            | Frequency     | 0.32    | 0.004  | 0.002 | -0.001 , 0.01  |
|                                                          | % Body Fat    | -0.24   | -1.75  | 1.27  | -4.33 , 0.83   |
|                                                          | Income        | -0.05   | -0.01  | 0.04  | -0.09 , 0.07   |
| Awakening Response<br>(n = 41)                           | Frequency     | 0.39*   | 0.08*  | 0.04  | 0.002 , 0.17   |
|                                                          | % Body Fat    | -0.17   | -25.84 | 25.92 | -78.35 , 26.68 |
|                                                          | Income        | 0.27    | 1.22   | 0.78  | -0.36 , 2.81   |
| Diurnal Slope<br>(n = 40)                                | Frequency     | 0.11    | 0.02   | 0.03  | -0.05 , 0.09   |
|                                                          | % Body Fat    | -0.20   | -21.56 | 20.42 | -62.97 , 19.84 |
|                                                          | Income        | -0.07   | -0.24  | 0.62  | -1.50 , 1.03   |
| F2-Isoprostanes<br>(n = 44)                              | Frequency     | 0.34    | 0.003  | 0.002 | 0.00 , 0.01    |
|                                                          | % Body Fat    | 0.04    | 0.27   | 1.08  | -1.92 , 2.45   |
|                                                          | Age           | -0.08   | -0.003 | 0.01  | -0.02 , 0.01   |
|                                                          | Income        | -0.11   | -0.02  | 0.03  | -0.09 , 0.05   |
| <b>Weight Stigma Consciousness</b>                       |               |         |        |       |                |

Running Title: Weight Stigma, Cortisol and Oxidative Stress

|                                |               |       |        |       |                |
|--------------------------------|---------------|-------|--------|-------|----------------|
| Cortisol                       |               |       |        |       |                |
| Morning Serum<br>(n = 45)      | Consciousness | 0.35* | 0.02*  | 0.01  | 0.001 , 0.04   |
|                                | % Body Fat    | -0.23 | -1.87  | 1.21  | -4.31 , 0.14   |
|                                | Global Stress | -0.11 | -0.07  | 0.11  | -0.29 , 0.15   |
| Daily Total (AUC)<br>(n = 38)  | Consciousness | 0.32  | 0.32   | 0.01  | -0.001 , 0.03  |
|                                | % Body Fat    | -0.14 | -0.14  | 1.10  | -3.23 , 1.24   |
|                                | Global Stress | 0.18  | 0.18   | 0.10  | -0.09 , 0.30   |
| Awakening Response<br>(n = 42) | Consciousness | 0.23  | 0.25   | 0.16  | -0.09 , 0.57   |
|                                | % Body Fat    | -0.01 | -1.17  | 22.57 | -48.86 , 44.53 |
|                                | Global Stress | 0.36* | 4.86*  | 2.02  | 0.78 , 8.95    |
| Diurnal Slope<br>(n = 41)      | Consciousness | 0.12  | 0.09   | 0.13  | -0.17 , 0.35   |
|                                | % Body Fat    | -0.17 | -18.26 | 17.34 | -53.39 , 16.88 |
|                                | Global Stress | -0.26 | -2.38  | 1.54  | -5.50 , 0.75   |
| F2-Isoprostanes<br>(n = 45)    | Consciousness | 0.34* | 0.02*  | 0.01  | 0.001 , 0.03   |
|                                | % Body Fat    | 0.15  | 1.08   | 1.07  | -1.08 , 3.23   |
|                                | Age           | -0.26 | -0.01  | 0.01  | -0.03 , 0.01   |
|                                | Global Stress | 0.03  | 0.02   | 0.09  | -0.16 , 0.20   |

Note: Cortisol units are ln(mg/dL) for serum and ln(nmol/L) for all other variables; F2-Isoprostane units are ln(ng/mL); CI = Confidence Interval; \* $p < 0.05$  (2-tailed);  $\beta$  values represent standardized units, whereas b values represent raw values.

**Figure S1.** Associations between composite weight stigma and outcome measures comparing the lowest quartile (<27.7) of BMI to all others. The association is similar between the two groups, consistent with the interpretation that weight stigma may even affect women who are nearer to what is considered "normal" BMI. Panel A. Weight stigma and morning serum cortisol. Panel B. Weight stigma and total diurnal cortisol AUC. Panel C. Weight stigma and cortisol awakening response. Panel D. Weight stigma and F2-isoprostanes.

A.

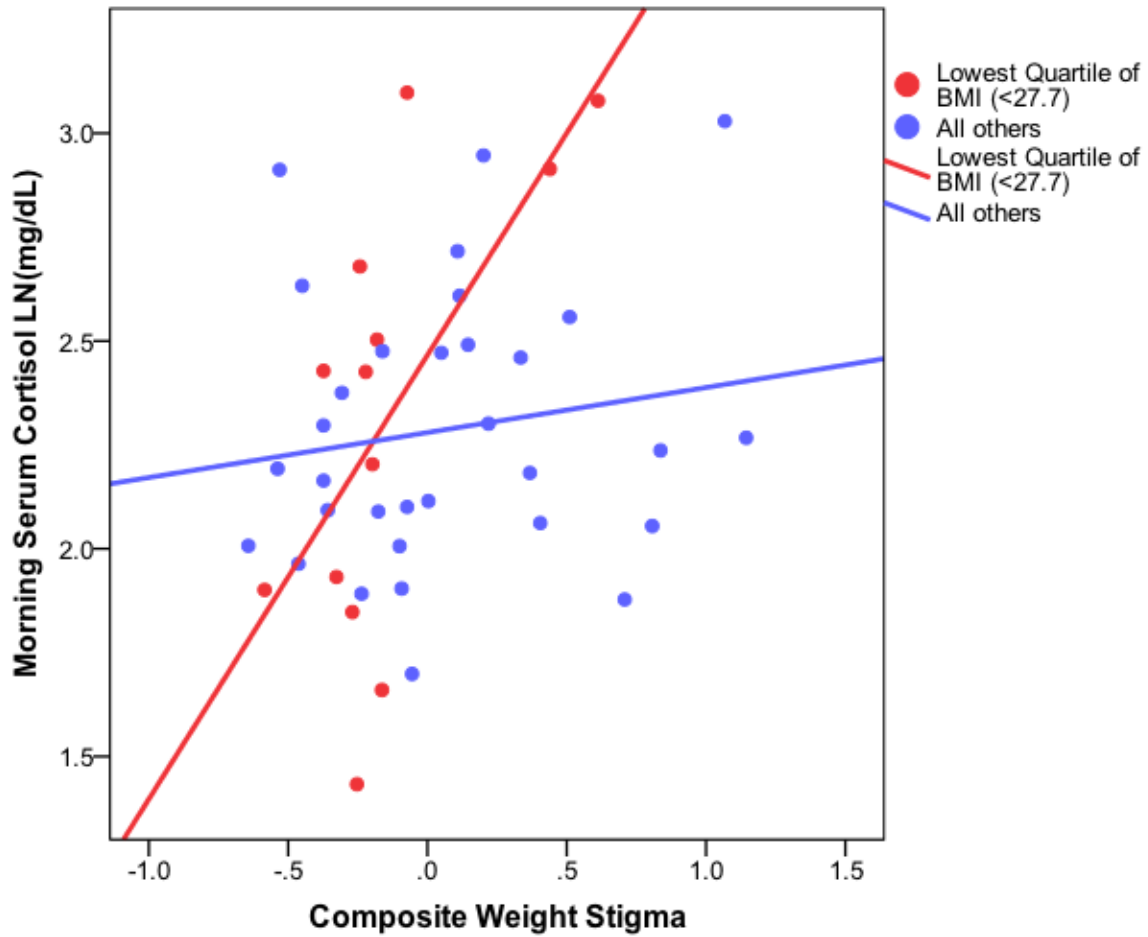

B.

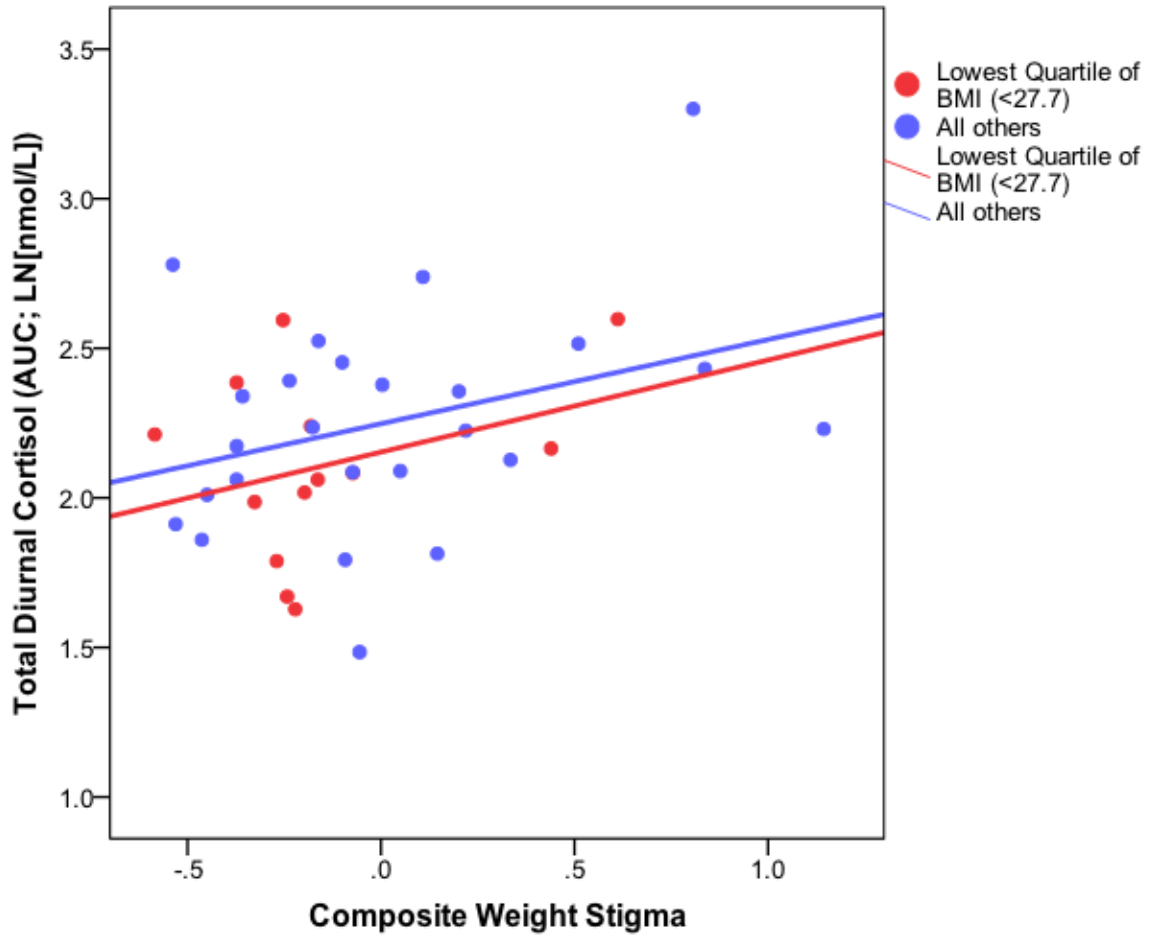

C.

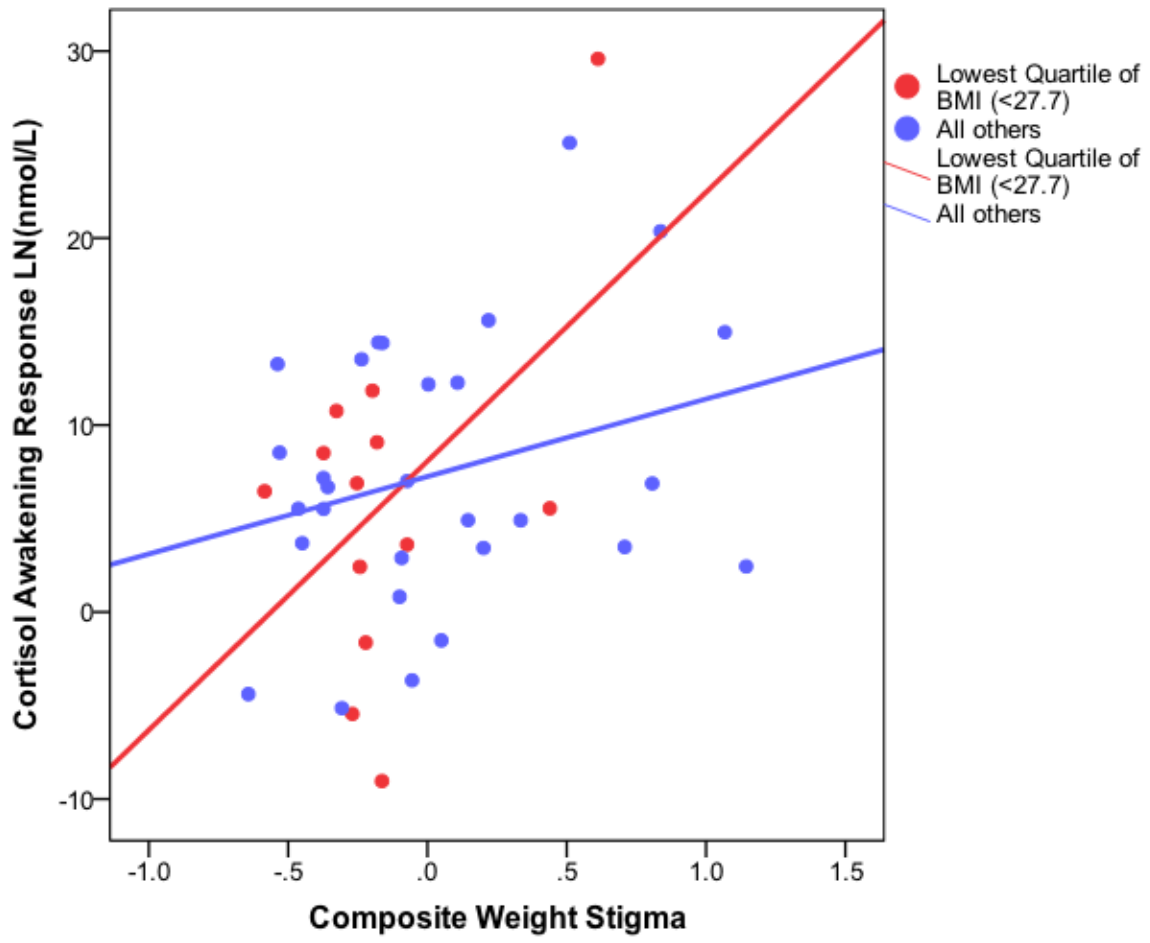

Supplement: NIHMS738744-supplement--3.pdf [file NIHMS738744-supplement--3.pdf]
