# Supplementary material
Source: PubMed Central journal article supplement (PMC4677673)
Supplement: NIHMS738744-supplement--2.pdf [file NIHMS738744-supplement--2.pdf]

Table S1. Zero-order correlations among study variables.

|                                | 2      | 3      | 4     | 5      | 6      | 7    | 8      | 9     | 10   | 11   | 12    | 13   | 14    |
|--------------------------------|--------|--------|-------|--------|--------|------|--------|-------|------|------|-------|------|-------|
| 1. Composite Weight Stigma     | .88*** | .88*** | .33*  | .39**  | .39**  | .03  | -.24   | .28   | .26  | .36* | .33*  | .01  | .47** |
| 2. Weight Stigma Frequency     |        | .56**  | .45** | .52**  | .44**  | .16  | -.41** | .11   | .21  | .25  | 0.2   | .05  | .42** |
| 3. Weight Stigma Consciousness |        |        | -.10  | .17    | .23    | -.10 | -.04   | .39** | .25  | .36* | .35*  | -.01 | .39** |
| 4. Abdominal Fat               |        |        |       | .77*** | .67*** | .03  | -.27   | -.07  | -.20 | -.03 | -.02  | -.17 | .36*  |
| 5. BMI                         |        |        |       |        | .69*** | .10  | -.32*  | -.11  | -.06 | .11  | .10   | -.16 | .38** |
| 6. Total Body Fat %            |        |        |       |        |        | .24  | -.13   | .05   | -.16 | -.09 | .06   | -.16 | .31*  |
| 7. Education                   |        |        |       |        |        |      | -.19   | .10   | -.06 | -.06 | -.10  | .07  | .06   |
| 8. Income                      |        |        |       |        |        |      |        | .22   | -.03 | -.12 | .14   | -.14 | -.15  |
| 9. Global Perceived Stress     |        |        |       |        |        |      |        |       | .03  | .28  | .44** | -.24 | .16   |
| 10. Morning Serum Cortisol     |        |        |       |        |        |      |        |       |      | .05  | .33*  | -.15 | .14   |
| 11. Daily Total Cortisol (AUC) |        |        |       |        |        |      |        |       |      |      | .52** | .36* | -.03  |
| 12. CAR                        |        |        |       |        |        |      |        |       |      |      |       | -.28 | .18   |
| 13. Cortisol Diurnal Slope     |        |        |       |        |        |      |        |       |      |      |       |      | -.03  |
| 14. F2-Isoprostanes            |        |        |       |        |        |      |        |       |      |      |       |      |       |

Note: Abdominal fat units are grams; Cortisol units are ln(mg/dL) for serum and ln(nmol/L) for saliva; F2-Isoprostane units are ln(ng/mL); BMI = Body Mass Index; AUC = Area Under the Curve; CAR = Cortisol Awakening Response; \* $p < 0.05$  (2-tailed), \*\* $p < 0.01$  (2-tailed), \*\*\* $p < 0.001$  (2-tailed).
